# Supplementary material
Source: publisher site journal article supplement (https://www.dovepress.com/article/424245)
Supplement: Supplementary file 1 [file get_supplementary_file.php]

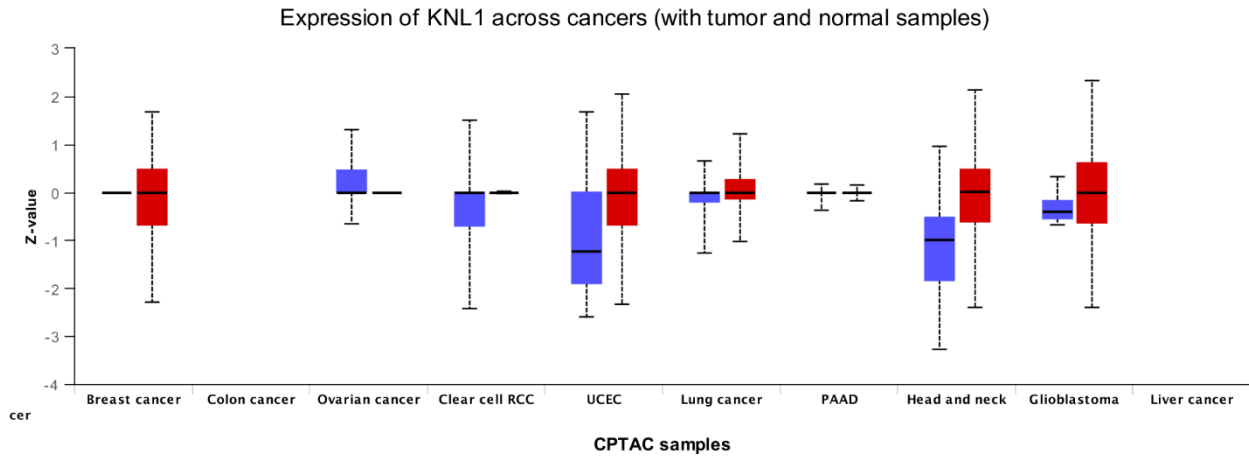

**Supp Fig 1.** The protein expression of KNL1 was verified using the CPTAC database.

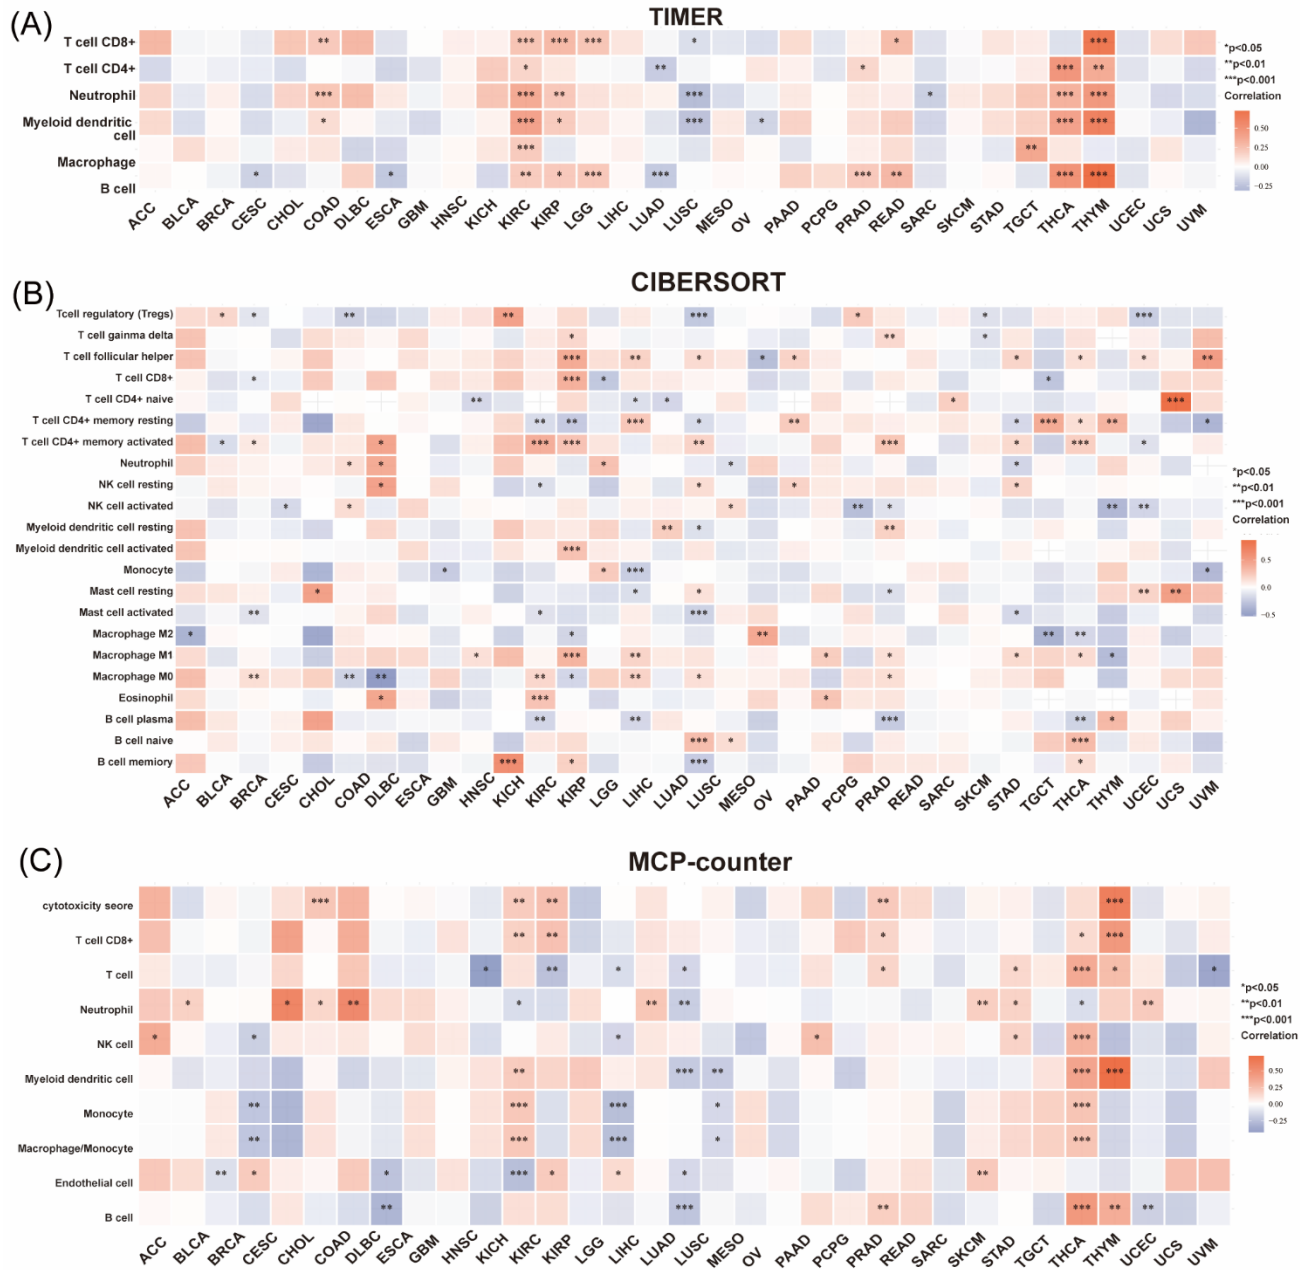

**Supp Fig 2.** The immune score of immune cells were calculated with TIMER, CIBERSORT, and MCP-counter algorithms. ns,  $p \geq 0.05$ ; \* $p < 0.05$ ; \*\* $p < 0.01$ ; \*\*\* $p < 0.001$ .





**Supp Fig 3.** The association between KNL1 expression and tumor grade (A), stage (B) were explored in 30 tumors from TISIDB database. Higher KNL1 expression was positively related with higher tumor stage and grade in 6 and 7 cancers, respectively. (C) ROC curves for the other 17 cancers, indicated that KNL1 had a great prognostic predictive ability.

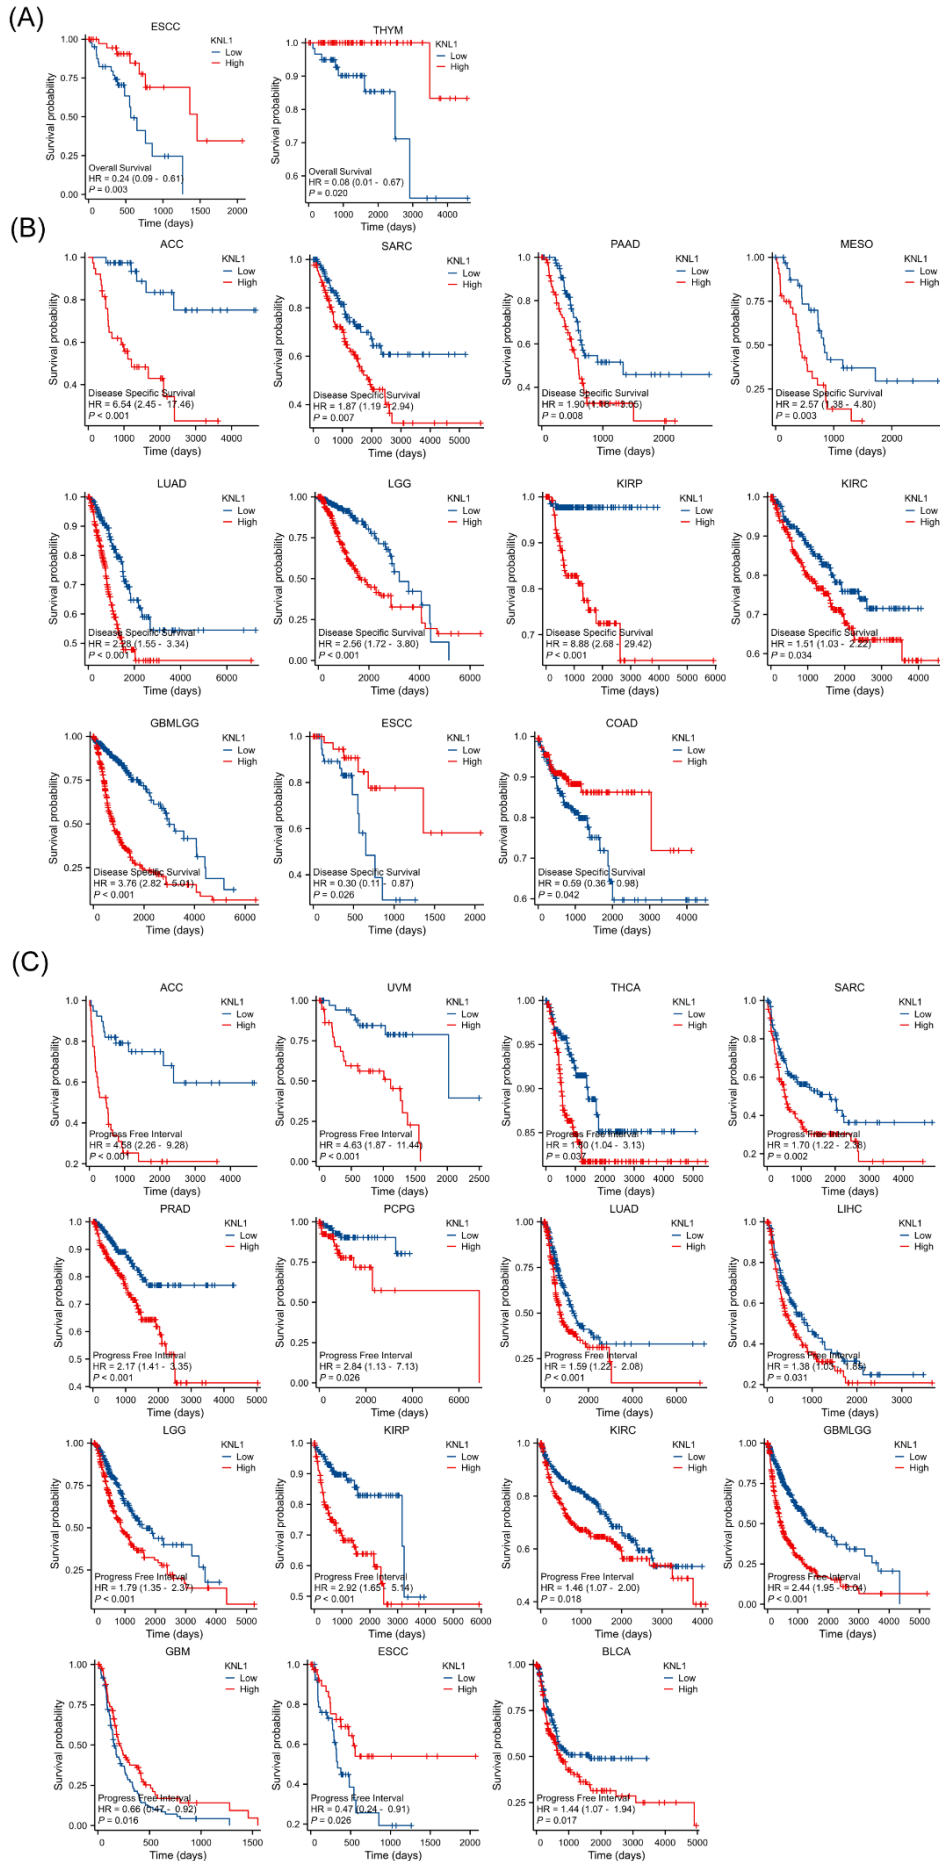

**Supp Fig 4.** (A) The KNL1-high group exhibited better OS in ESCC and THYM. (B) K-M survival analysis showed that DSS was significantly associated with KNL1 expression levels in 11 cancers. The KNL1-high group exhibited better DSS in ESCC and COAD. (C) PFI was significantly associated with KNL1 expression levels in 15 cancers. The KNL1-high group exhibited better DSS in ESCC and GBM.

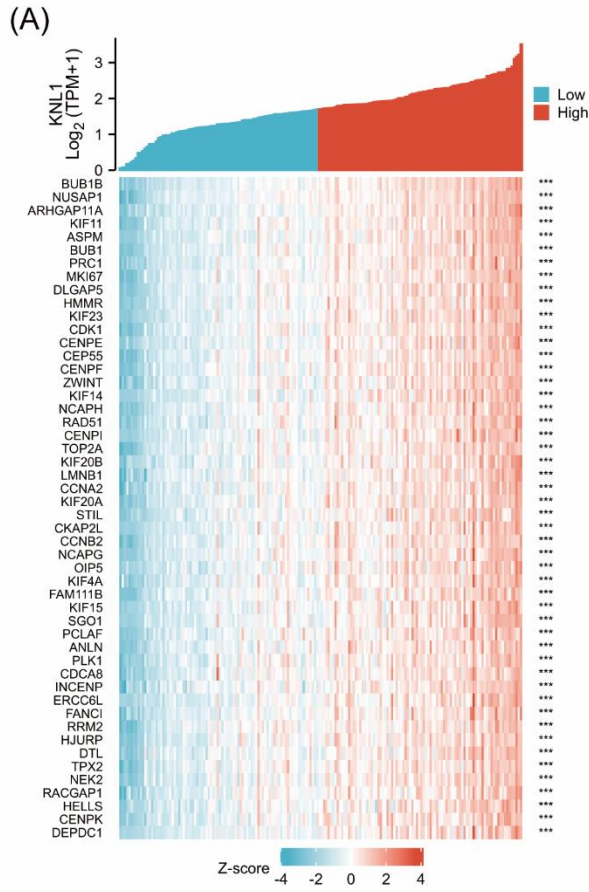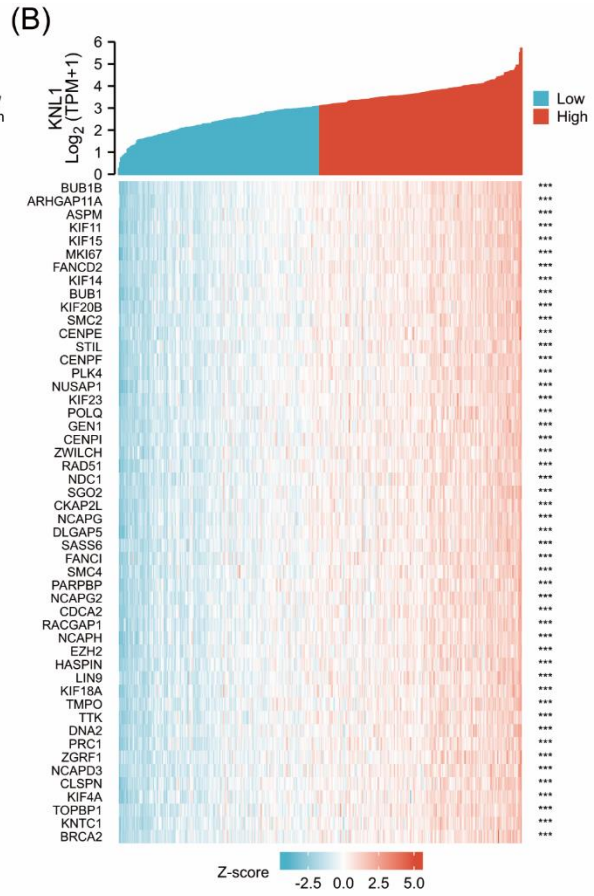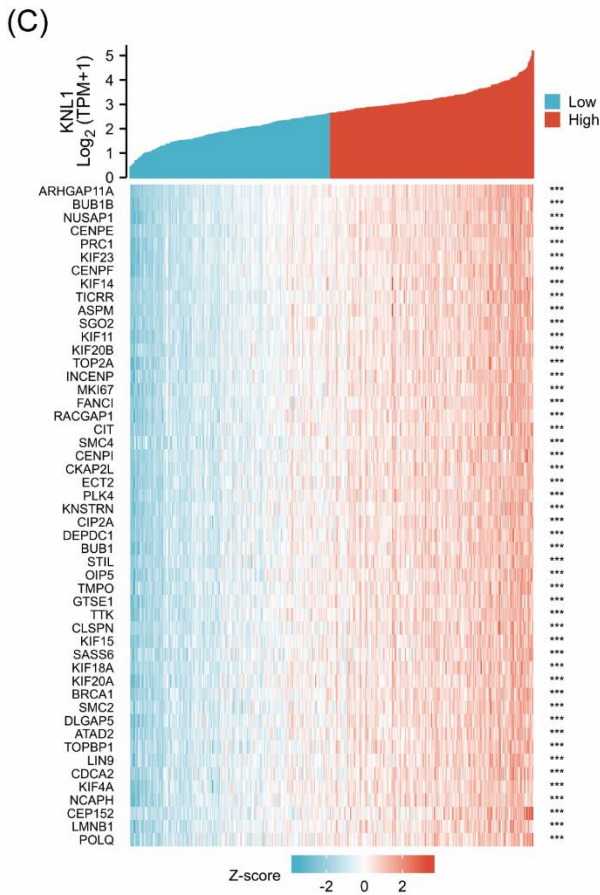



**Supp Fig 5.** The heatmap of the top 50 most related genes of KNL1 in PAAD (A), STAD (B), and BCLA (C).

(A)

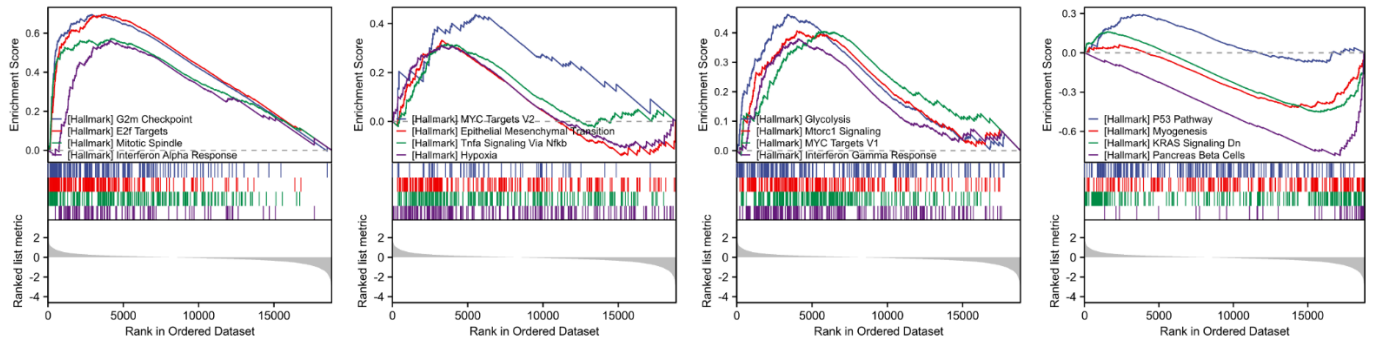

(B)

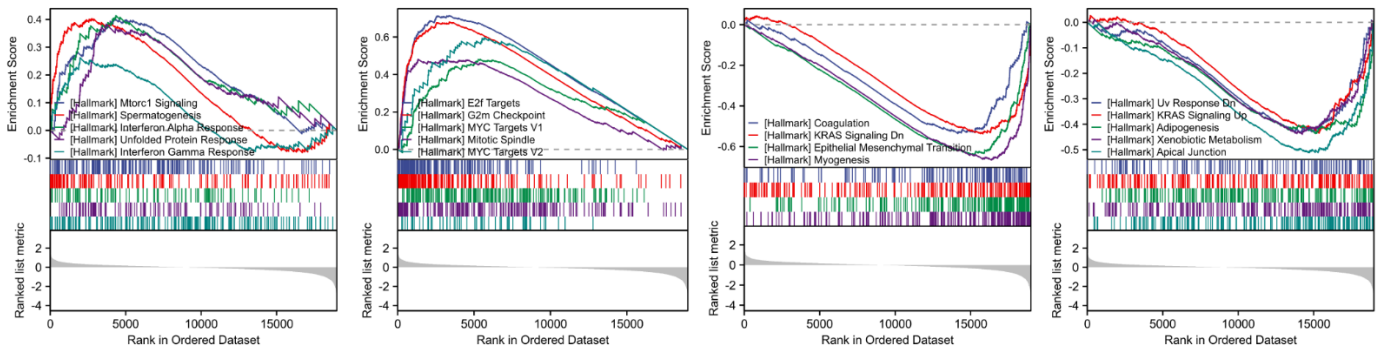

(C)

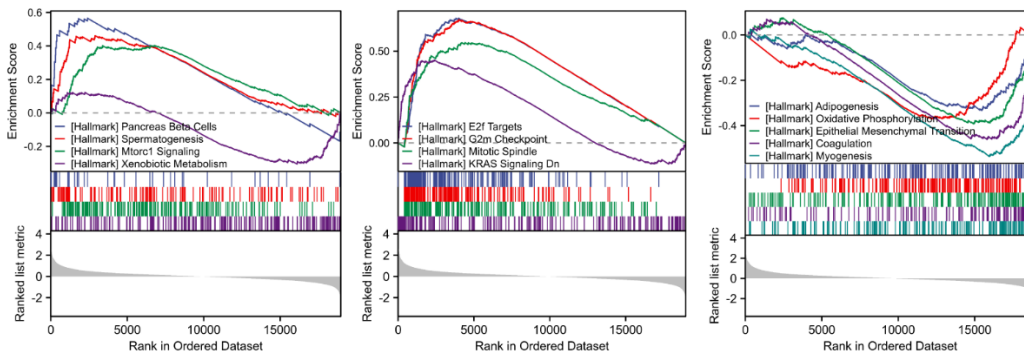

**Supp Fig 6.** GSEA analysis in PAAD (A), STAD (B), and BLCA (C). G2m checkpoint, E2f targets, mitotic spindle, epithelial mesenchymal transition, myogenesis and KRAS signaling pathways were significantly enriched in KNL1-related DEGs.

(A)

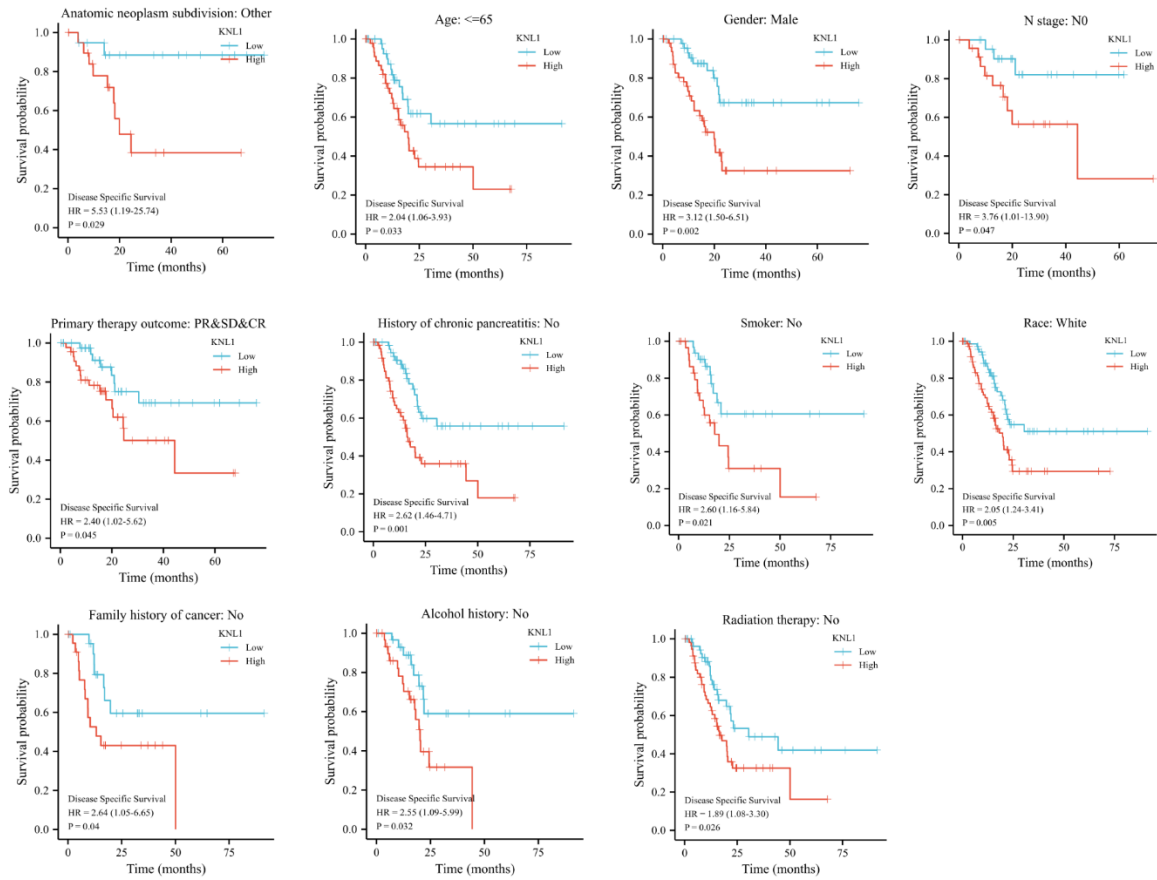

(B)

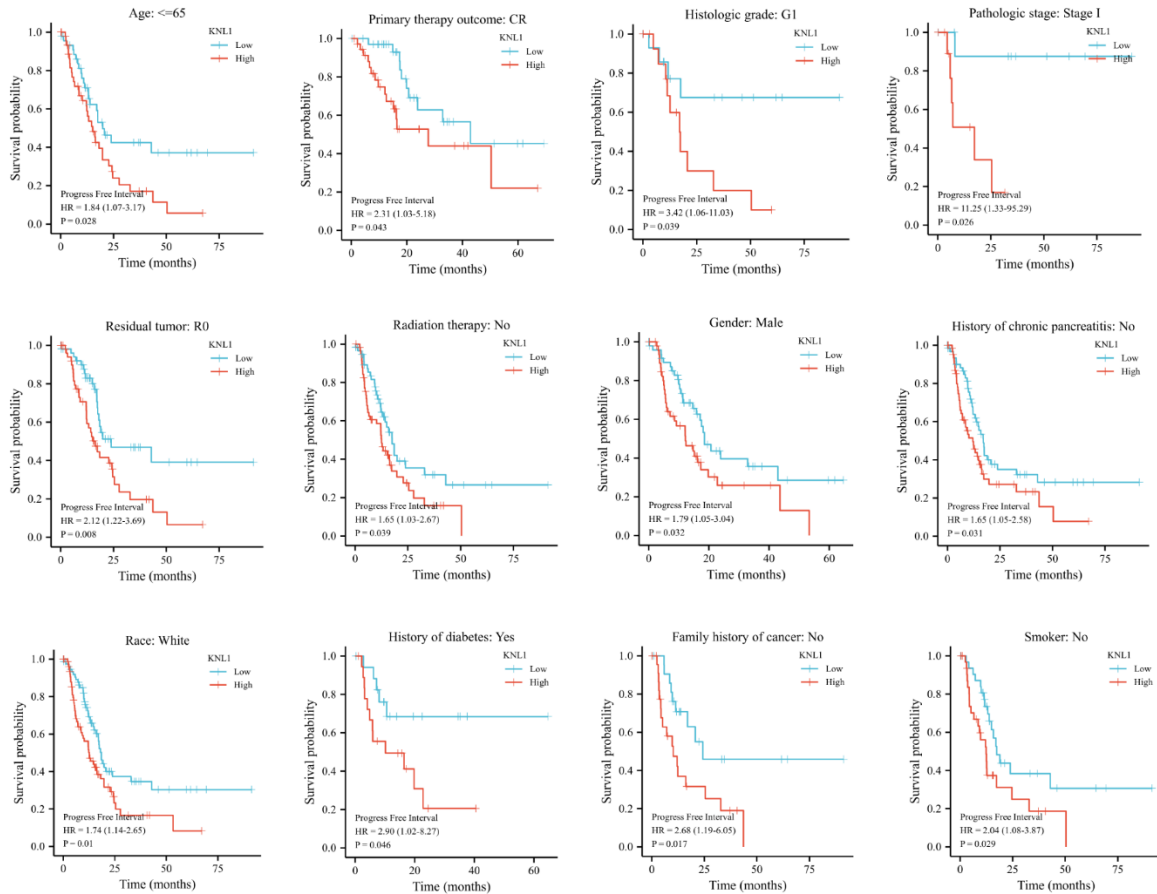

**Supp Fig 7.** Survival analysis of different clinicopathological subgroups in PAAD indicated that high expression levels of KNL1 were associated with poor DSS (A) and PFI (B) in clinical subgroups

**Supplementary table 1.** The amplification's expression level of KNL1 of qPCR in SV-HUC-1, 5637, T24, UMUC3 and J82 cell lines after being processed with the  $\Delta\Delta\text{CT}$  technique and adjusted against GAPDH mRNA.

| <b>Group</b> | <b>Sample</b> | <b>GAPDH</b> | <b>KNL1</b> |
|--------------|---------------|--------------|-------------|
| SV-HUC-1     | sample1       | 16.47        | 23.86       |
| SV-HUC-1     | sample2       | 16.35        | 23.82       |
| SV-HUC-1     | sample3       | 16.29        | 23.79       |
| 5637         | sample1       | 20.5         | 25.52       |
| 5637         | sample2       | 20.45        | 25.59       |
| 5637         | sample3       | 20.3         | 25.63       |
| T24          | sample1       | 16.4         | 22.46       |
| T24          | sample2       | 16.36        | 22.57       |
| T24          | sample3       | 16.24        | 22.52       |
| UMUC3        | sample1       | 17.43        | 24.1        |
| UMUC3        | sample2       | 17.32        | 23.89       |
| UMUC3        | sample3       | 17.18        | 24.03       |
| J82          | sample1       | 18.2         | 24.75       |
| J82          | sample2       | 18.15        | 24.71       |
| J82          | sample3       | 18.09        | 24.67       |

**Supplementary table 2.** H-score obtained after IHC staining of cancer and paracancerous tissue sections from 8 case-confirmed PAAD patients

| ID<br>Index                            | 215938   | 215938   | 215637    | 215637    | 215384    | 215384   | 214163   | 214163   | 213735   | 213735    | 200947    | 200947   | 192287    | 192287   | 183039    | 183039    |
|----------------------------------------|----------|----------|-----------|-----------|-----------|----------|----------|----------|----------|-----------|-----------|----------|-----------|----------|-----------|-----------|
|                                        | 9        | 9        | 2         | 2         | 0         | 0        | 9        | 9        | 0        | 0         | 7         | 7        | 1         | 1        | 2         | 2         |
| Site                                   | P        | T        | P         | T         | P         | T        | T        | P        | T        | P         | P         | T        | T         | P        | T         | P         |
| <b>No. Total non-background pixels</b> | 745457   | 943243   | 804381    | 710603    | 111843    | 389143   | 859873   | 166149   | 750853   | 962636    | 108848    | 779277   | 155121    | 475452   | 237818    | 535585    |
| <b>No. Background pixels</b>           | 455402   | 803456   | 281361    | 949417    | 911221    | 987871   | 109570   | 370686   | 102038   | 193298    | 570612    | 545174   | 351561    | 663013   | 265461    | 121997    |
| <b>No. Negative pixels</b>             | 57508.00 | 19782.00 | 151109.00 | 268600.00 | 248178.00 | 48672.00 | 42648.00 | 80222.00 | 55572.00 | 682323.00 | 235191.00 | 67145.00 | 176944.00 | 80250.00 | 139110.00 | 761011.00 |
| <b>No. Weak-Positive pixels</b>        | 530563   | 602185   | 396098    | 256019    | 670842    | 137613   | 504394   | 114315   | 490605   | 729047    | 738949    | 521118   | 735695    | 247432   | 883023    | 235733    |
|                                        | 1.00     | 7.00     | 7.00      | 9.00      | 1.00      | 7.00     | 3.00     | 87.00    | 8.00     | 0.00      | 7.00      | 7.00     | 7.00      | 9.00     | .00       | 3.00      |

|                                             |        |        |        |        |        |        |        |        |        |        |        |        |        |        |        |        |
|---------------------------------------------|--------|--------|--------|--------|--------|--------|--------|--------|--------|--------|--------|--------|--------|--------|--------|--------|
| <b>No. Moderate-Positive pixels</b>         | 203579 | 332902 | 376860 | 326329 | 403853 | 201438 | 323010 | 508110 | 246408 | 159401 | 312985 | 247769 | 788308 | 201805 | 107269 | 212185 |
| <b>No. Strong-Positive pixels</b>           | 4.00   | 9.00   | 3.00   | 3.00   | 3.00   | 0.00   | 3.00   | 8.00   | 2.00   | 8.00   | 6.00   | 0.00   | 6.00   | 7.00   | 4.00   | 3.00   |
| <b>Mean Density of all pixels</b>           | 12.97  | 13.99  | 16.07  | 19.95  | 14.58  | 19.83  | 14.98  | 13.43  | 13.74  | 12.25  | 13.78  | 13.46  | 16.17  | 15.88  | 19.22  | 15.60  |
| <b>Mean Density of Negative pixels</b>      | 14.69  | 16.27  | 17.35  | 13.80  | 17.43  | 9.51   | 8.80   | 12.37  | 10.42  | 18.18  | 17.15  | 11.68  | 17.06  | 12.07  | 16.29  | 14.02  |
| <b>Mean Density of Weak-Positive pixels</b> | 10.29  | 10.78  | 11.28  | 10.76  | 10.86  | 10.63  | 10.44  | 11.20  | 10.57  | 10.14  | 10.98  | 10.70  | 12.00  | 10.67  | 10.75  | 11.00  |
| <b>Mean Density</b>                         | 20.12  | 20.06  | 20.80  | 22.82  | 20.26  | 23.14  | 21.21  | 18.83  | 20.14  | 19.56  | 19.98  | 19.63  | 20.21  | 21.42  | 22.48  | 20.81  |

**of  
Modera  
te-  
Positive  
pixels  
Mean  
Density  
of  
Strong-  
Positive  
pixels  
Ratio of  
Negativ  
e pixels  
to total  
pixels  
Ratio of  
Strong-  
Positive  
pixels  
to total  
pixels  
Ratio of  
Modera  
te-  
Positive**

|       |       |       |       |       |       |       |       |       |       |       |       |       |       |       |       |
|-------|-------|-------|-------|-------|-------|-------|-------|-------|-------|-------|-------|-------|-------|-------|-------|
| 40.35 | 38.74 | 40.30 | 44.30 | 43.05 | 43.48 | 41.97 | 39.54 | 40.78 | 41.47 | 39.90 | 39.97 | 38.02 | 41.43 | 43.77 | 41.58 |
| 1.00  | 0.00  | 2.00  | 4.00  | 2.00  | 1.00  | 0.00  | 0.00  | 1.00  | 7.00  | 2.00  | 1.00  | 1.00  | 2.00  | 6.00  | 14.00 |
| 1.00  | 1.00  | 2.00  | 14.00 | 2.00  | 12.00 | 3.00  | 0.00  | 1.00  | 1.00  | 1.00  | 0.00  | 1.00  | 4.00  | 12.00 | 2.00  |
| 27.00 | 35.00 | 47.00 | 46.00 | 36.00 | 52.00 | 38.00 | 31.00 | 33.00 | 17.00 | 29.00 | 32.00 | 51.00 | 42.00 | 45.00 | 40.00 |



|                                                                                                                                                                                                    |        |        |        |        |        |        |        |        |        |        |        |        |        |        |        |        |
|----------------------------------------------------------------------------------------------------------------------------------------------------------------------------------------------------|--------|--------|--------|--------|--------|--------|--------|--------|--------|--------|--------|--------|--------|--------|--------|--------|
| <b>pixels<br/>to total<br/>pixels<br/>Ratio of<br/>Weak-<br/>Positive<br/>pixels<br/>to total<br/>pixels<br/>Ratio of<br/>all<br/>positive<br/>pixels<br/>to total<br/>pixels<br/>H-<br/>Score</b> | 71.00  | 64.00  | 49.00  | 36.00  | 60.00  | 35.00  | 59.00  | 69.00  | 65.00  | 76.00  | 68.00  | 67.00  | 47.00  | 52.00  | 37.00  | 44.00  |
|                                                                                                                                                                                                    | 99.23  | 99.79  | 98.12  | 96.22  | 97.78  | 98.75  | 99.50  | 99.52  | 99.26  | 92.91  | 97.84  | 99.14  | 98.86  | 98.31  | 94.15  | 85.79  |
|                                                                                                                                                                                                    | 128.03 | 136.39 | 149.03 | 170.68 | 137.27 | 173.76 | 143.63 | 130.36 | 134.28 | 110.71 | 128.99 | 131.88 | 150.91 | 148.41 | 163.09 | 129.73 |

---

P: paracancerous tissue; T: cancer tissue
